# Supplementary material for: Structure and dynamics of aqueous VOSO4 solutions in conventional flow through cell design: a molecular dynamics simulation study
Source: Royal Society of Chemistry journal article supplement (doi:10.1039/d4cp02934h), 2024-01-01
Supplement: d4cp02934h10.pdf [file d4cp02934h10.pdf]

Supporting Information

**Structure and dynamics of aqueous  $\text{VOSO}_4$  solution  
in conventional flow through cell design: a molecular  
dynamics simulation study**

Anwesa Karmakar

Department of Chemistry and Physics, The University of Akron, Ohio 44325

\*E-mail: [anwesa.karmakar@gmail.com](mailto:anwesa.karmakar@gmail.com)

# 1 Molecular dynamics simulation

All molecular dynamics simulation were performed within the periodic boundary condition to simulate the bulk and interface properties for system 1-9. The simulation boxes were made of the certain no of the ions and water molecules. Those numbers are already given in the manuscript. The box length for each simulation was determined using the experimental density of each solution. An energy minimization was run to remove the hard contacts. An isothermal-isobaric molecular dynamics simulation was performed to check the density of the system. After the minimization step additional  $\sim 10$  ns MD simulation was performed in isochoric-isothermal (NVT) ensemble. For each system, the isobaric-isothermal (NPT) simulation run was fixed except for the concentrated (system 3) and dilute (system 5) solution, the simulation run length was longer than the previous run to promote a better convergence in the bulk density. At last a production run for each system was performed in isochoric-isothermal (NVT) ensemble for  $\sim 50$  ns. Parrinello-Rahman<sup>1</sup> barostat and Nosè-Hoover thermostat<sup>2,3</sup> were used for the NPT and NVT simulations. The all bonds involving hydrogen atoms were constrained using the LINCS algorithm as available in GROMACS.<sup>4</sup> A timestep of 1 fs was used for all simulations. A radial cutoff at half box length was imposed to compute the non-bonded interactions in real space for system 1- 9. The particle mesh Ewald (PME) method<sup>5,6</sup> with an interpolation order 4 and a relative tolerance of  $10^{-5}$  was used to calculate the electrostatic interactions above the half box length for each system. The tail corrections were added to potential energy and pressure. The Lorentz-Berthelot mixing rules were used to estimate the LJ parameters between the two different atom types.<sup>7,8</sup> The single precision GROMACS 2022 was used to run all the MD simulations. The force field parameters used for the simulations were given in table S1 and S2. The details about the group and designation of each atom in a group were shown in: (a) fig. S1 for the H<sub>2</sub>O molecule, (b) fig. S2 for the HSO<sub>4</sub><sup>-</sup> ion, (c) fig. S3 for the SO<sub>4</sub><sup>2-</sup>, (d) fig. S4 for the H<sub>3</sub>O<sup>+</sup> and, (e) fig. S5 for the VO<sup>2+</sup> ion, respectively.

| Bonded parameter              |         |            |                                               |  |  |
|-------------------------------|---------|------------|-----------------------------------------------|--|--|
| Group                         | Bond    | $l_0$ (nm) | $k_r$ (KJ.mol <sup>-1</sup> nm <sup>2</sup> ) |  |  |
| VO <sup>2+</sup>              | V4-OV   | 0.157      | 215159.7                                      |  |  |
| SO <sub>4</sub> <sup>2-</sup> | S1-OS1  | 0.157      | 215159.7                                      |  |  |
|                               | S1-OS2  | 0.1487     | 439740.0                                      |  |  |
|                               | S1-OS3  | 0.1487     | 439740.0                                      |  |  |
|                               | S1-OS4  | 0.1487     | 439740.0                                      |  |  |
| HSO <sub>4</sub> <sup>-</sup> | S2-O1   | 0.1487     | 439740.0                                      |  |  |
|                               | S2-O2   | 0.1487     | 439740.0                                      |  |  |
|                               | S2-O3   | 0.1487     | 439740.0                                      |  |  |
|                               | S2-O5   | 0.1633     | 178960.0                                      |  |  |
|                               | O5-H1   | 0.1000     | 418400.0                                      |  |  |
| H <sub>3</sub> O <sup>+</sup> | Oh1-Hh1 | 0.0973     | 345000.0                                      |  |  |
|                               | Oh1-Hh2 | 0.0973     | 345000.0                                      |  |  |
|                               | Oh1-Hh3 | 0.0973     | 345000.0                                      |  |  |
| H <sub>2</sub> O              | OW-HW1  | 0.1        | 345000.0                                      |  |  |
|                               | OW-HW2  | 0.1        | 345000.0                                      |  |  |

  

| Angle parameter               |             |                |                                                     |  |  |
|-------------------------------|-------------|----------------|-----------------------------------------------------|--|--|
| Group                         | Angle       | $\theta$ (deg) | $k_\theta$ (KJ.mol <sup>-1</sup> rad <sup>2</sup> ) |  |  |
| SO <sub>4</sub> <sup>2-</sup> | OS1-S1-OS2  | 109.470        | 1171.60                                             |  |  |
|                               | OS1-S1-OS3  | 109.470        | 1171.60                                             |  |  |
|                               | OS1-S1-OS4  | 109.470        | 1171.60                                             |  |  |
|                               | OS2-S1-OS3  | 109.470        | 1171.60                                             |  |  |
|                               | OS2-S1-OS4  | 109.470        | 1171.60                                             |  |  |
|                               | OS3-S1-OS4  | 109.470        | 1171.60                                             |  |  |
| HSO <sub>4</sub> <sup>-</sup> | O1-S2-O2    | 114.000        | 969.000                                             |  |  |
|                               | O1-S2-O3    | 114.000        | 969.000                                             |  |  |
|                               | O1-S2-O5    | 103.500        | 1239.60                                             |  |  |
|                               | O2-S2-O3    | 114.000        | 969.000                                             |  |  |
|                               | O2-S2-O5    | 103.500        | 1239.60                                             |  |  |
|                               | O3-S2-O5    | 103.500        | 1239.60                                             |  |  |
|                               | S2-O5-H1    | 109.500        | 1046.00                                             |  |  |
| H <sub>3</sub> O <sup>+</sup> | Hh1-Oh1-Hh2 | 111.600        | 383.00                                              |  |  |
|                               | Hh2-Oh1-Hh3 | 111.600        | 383.00                                              |  |  |
|                               | Hh1-Oh1-Hh3 | 111.600        | 383.00                                              |  |  |

  

| Dihedral angle parameter <sup>9</sup> |                |                             |                             |                             |                             |
|---------------------------------------|----------------|-----------------------------|-----------------------------|-----------------------------|-----------------------------|
| Group                                 | Dihedral angle | $i$ (KJ.mol <sup>-1</sup> ) | $j$ (KJ.mol <sup>-1</sup> ) | $k$ (KJ.mol <sup>-1</sup> ) | $l$ (KJ.mol <sup>-1</sup> ) |
| HSO <sub>4</sub> <sup>-</sup>         | H1-O5-S2-O1    | 1.8                         | -5.4                        | 0.0                         | 7.2                         |
|                                       | H1-O5-S2-O1    | 1.8                         | -5.4                        | 0.0                         | 7.2                         |
|                                       | H1-O5-S2-O1    | 1.8                         | -5.4                        | 0.0                         | 7.2                         |

Table S 1: The bonded parameters for each atom used in the MD simulation.

| Non bonded parameter          |      |               |                                    |                     |
|-------------------------------|------|---------------|------------------------------------|---------------------|
| Group                         | Atom | $\sigma$ (nm) | $\epsilon$ (KJ.mol <sup>-1</sup> ) | q (e <sup>-</sup> ) |
| VO <sup>2+</sup>              | V4   | 0.2602        | 0.123                              | 2.062               |
|                               | OV   | 2.253         | 2.9938                             | -0.062              |
| SO <sub>4</sub> <sup>2-</sup> | S1   | 0.3555        | 0.837                              | 0.8                 |
|                               | OS1  | 0.368         | 0.65                               | -0.70               |
|                               | OS2  | 0.368         | 0.65                               | -0.70               |
|                               | OS3  | 0.368         | 0.65                               | -0.70               |
|                               | OS4  | 0.368         | 0.65                               | -0.70               |
| HSO <sub>4</sub> <sup>-</sup> | S2   | 0.355         | 1.046                              | 1.18                |
|                               | O1   | 0.315         | 0.837                              | -0.65               |
|                               | O2   | 0.315         | 0.837                              | -0.65               |
|                               | O3   | 0.315         | 0.837                              | -0.65               |
|                               | O5   | 0.290         | 0.586                              | -0.45               |
|                               | H1   | 0.0           | 0.0                                | 0.22                |
| H <sub>3</sub> O <sup>+</sup> | Oh1  | 0.316557      | 0.650194                           | -0.248              |
|                               | Hh1  | 0.0           | 0.0                                | 0.416               |
|                               | Hh2  | 0.0           | 0.0                                | 0.416               |
|                               | Hh3  | 0.0           | 0.0                                | 0.416               |
| H <sub>2</sub> O              | OW   | 0.316557      | 0.650194                           | -0.8476             |
|                               | HW1  | 0.0           | 0.0                                | 0.4238              |
|                               | HW2  | 0.0           | 0.0                                | 0.4238              |

Table S 2: The non-bonded parameters for each atom used in the MD simulation.

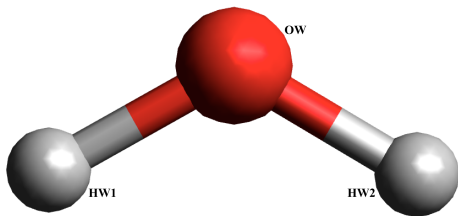

Figure. S 1

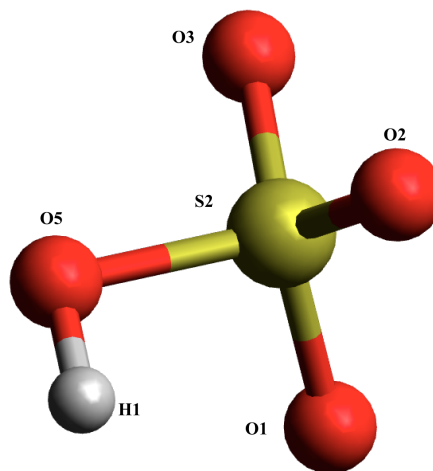

Figure. S 2

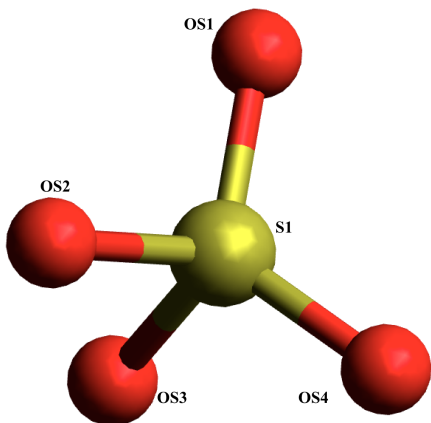

Figure. S 3

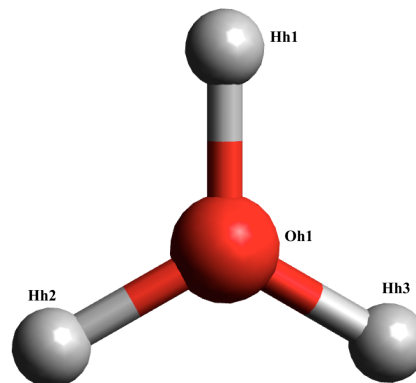

Figure. S 4

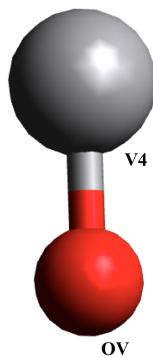

Figure. S 5

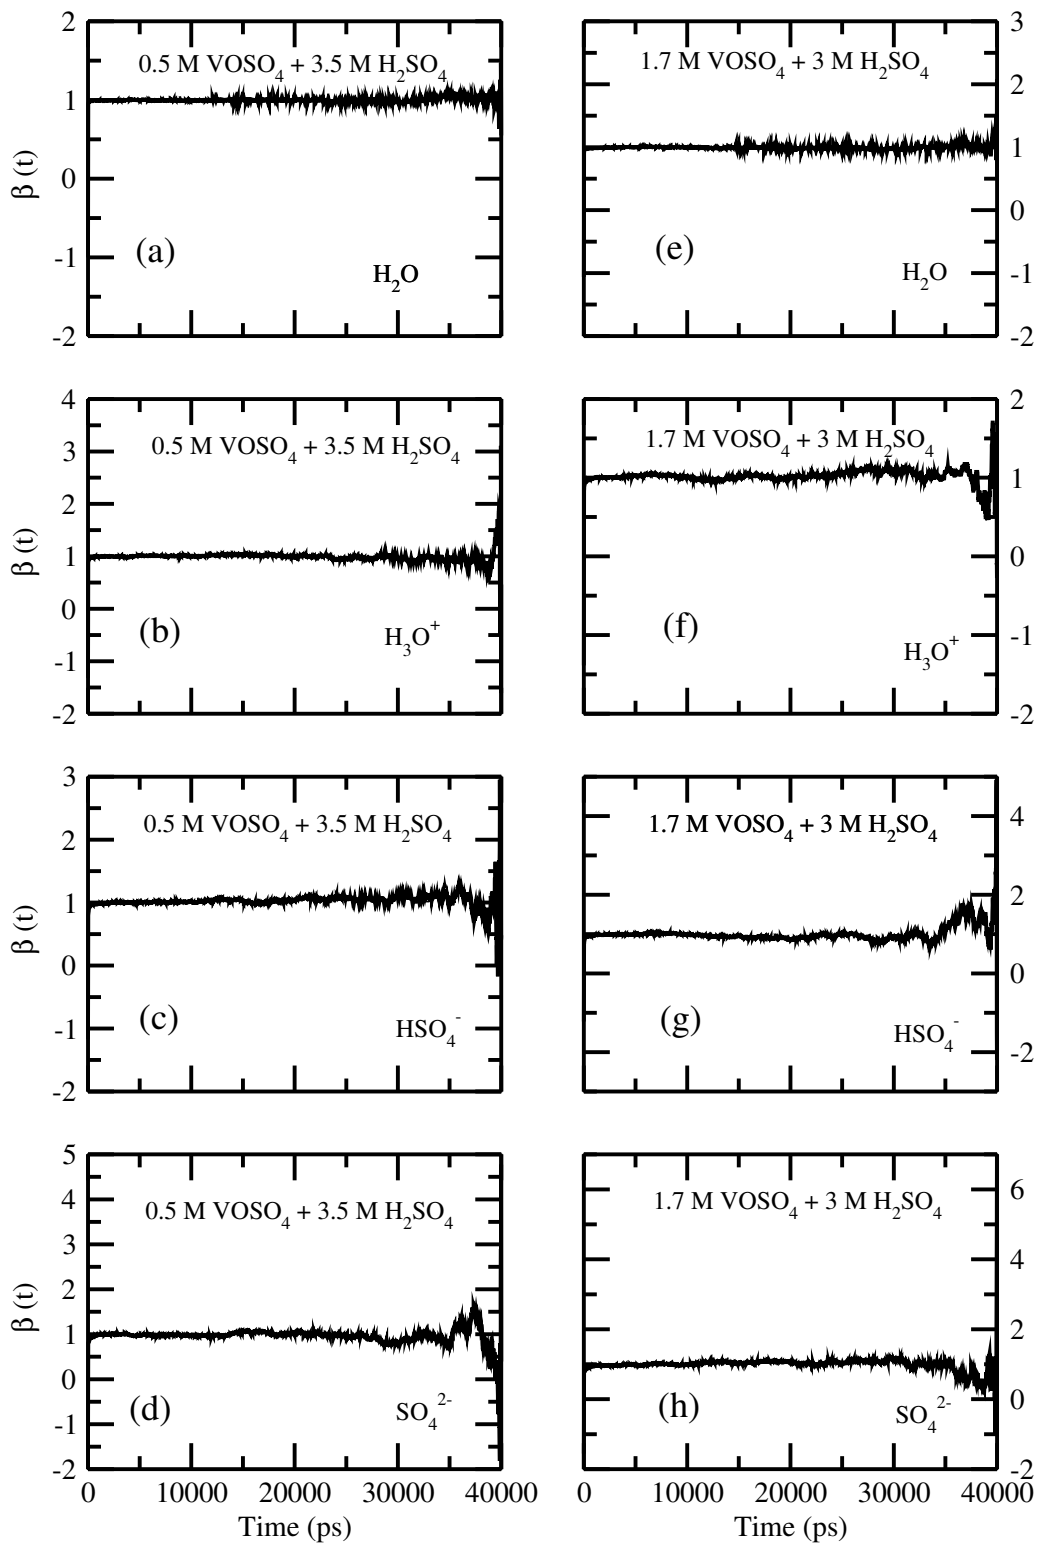

Figure. S 6: The  $\beta(t)$  versus time (t) plot for 0.5 M  $\text{VOSO}_4 + 3.5 \text{ M H}_2\text{SO}_4$  (system 1) and 1.7 M  $\text{VOSO}_4 + 3 \text{ M H}_2\text{SO}_4$  (system 3) solution at 25 °C.

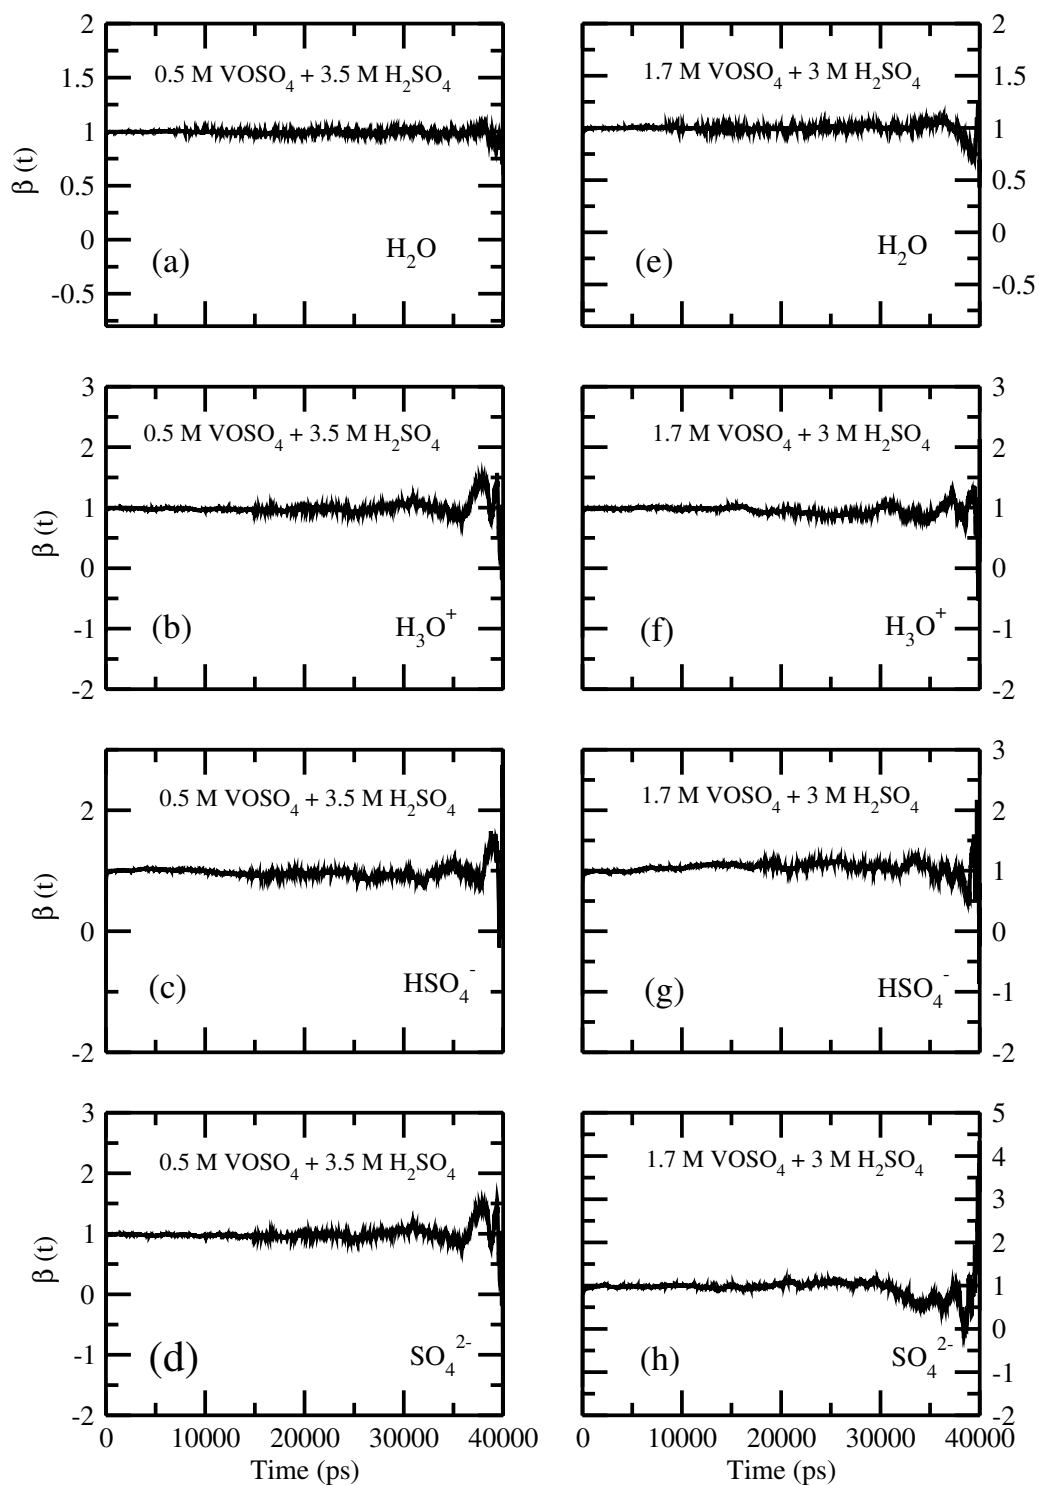

Figure. S 7: The  $\beta(t)$  versus time (t) plot for 0.5 M  $\text{VOSO}_4 + 3.5 \text{ M H}_2\text{SO}_4$  (system 2) and 1.7 M  $\text{VOSO}_4 + 3 \text{ M H}_2\text{SO}_4$  (system 4) solution at 50 °C.

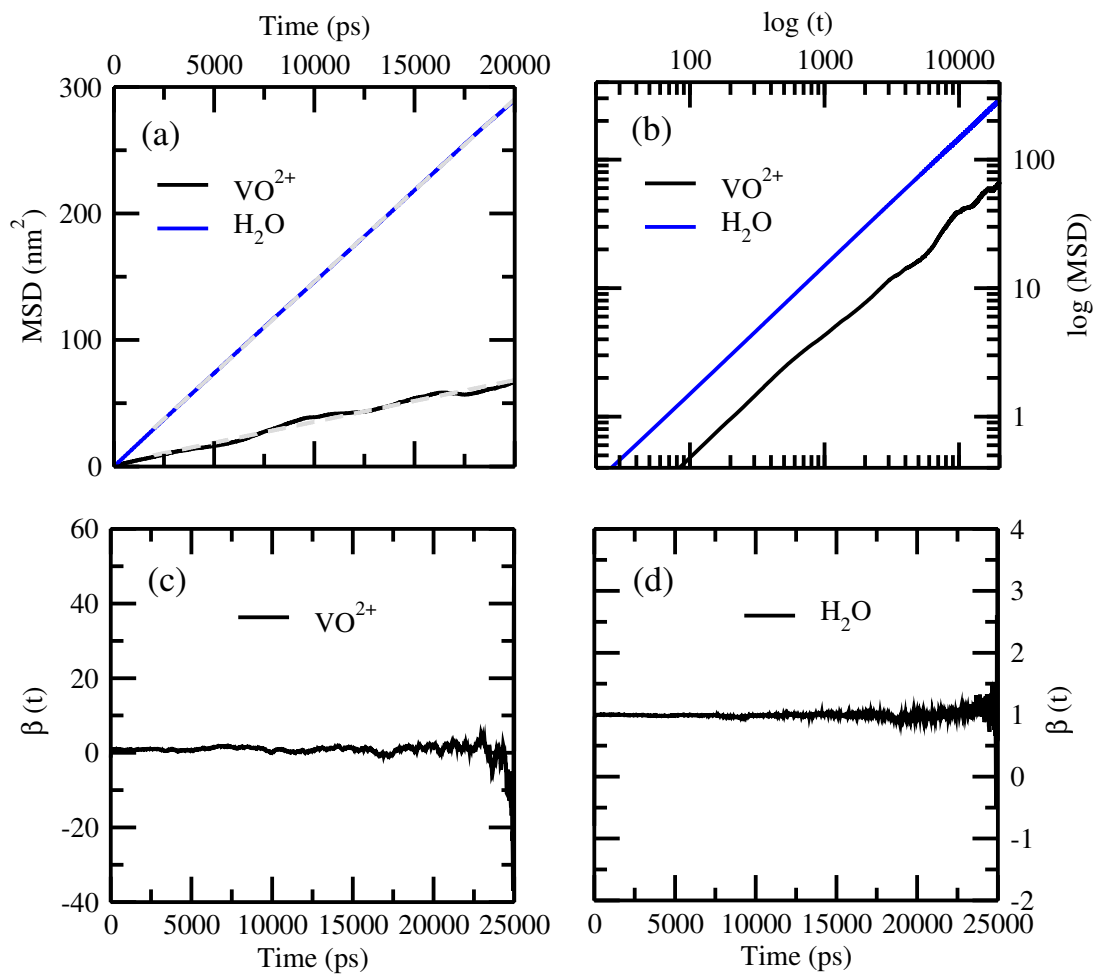

Figure. S 8: The diffusion for 1  $\text{VO}^{2+}$  + 1000  $\text{H}_2\text{O}$  system (system 5) at 25 °C.



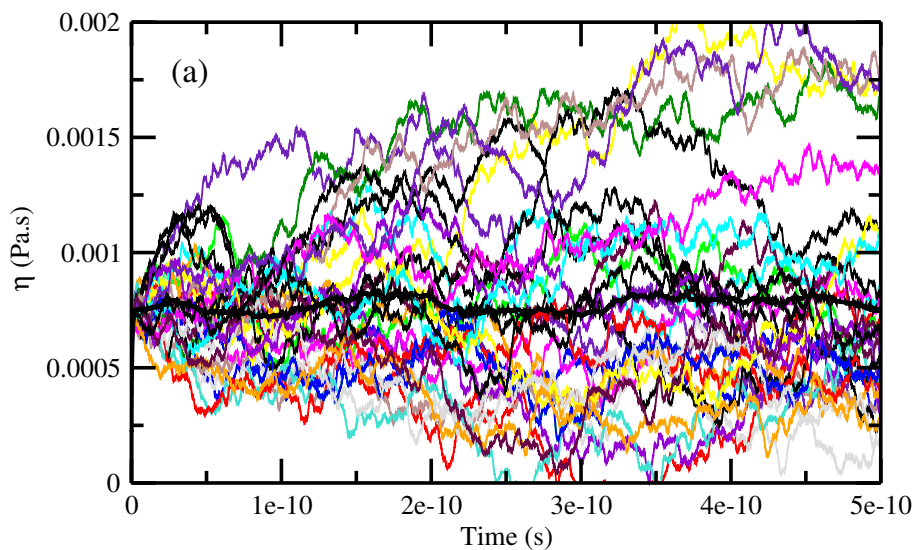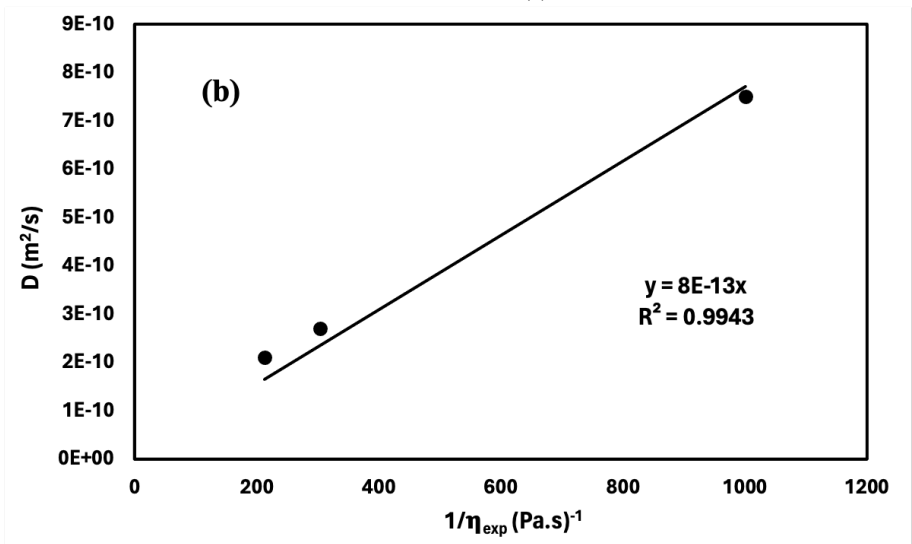

Figure. S 9: (a) The viscosity of the system 5. (b) The plot for Stokes - Einstein equation consisting the system 1, 3 and system 5.

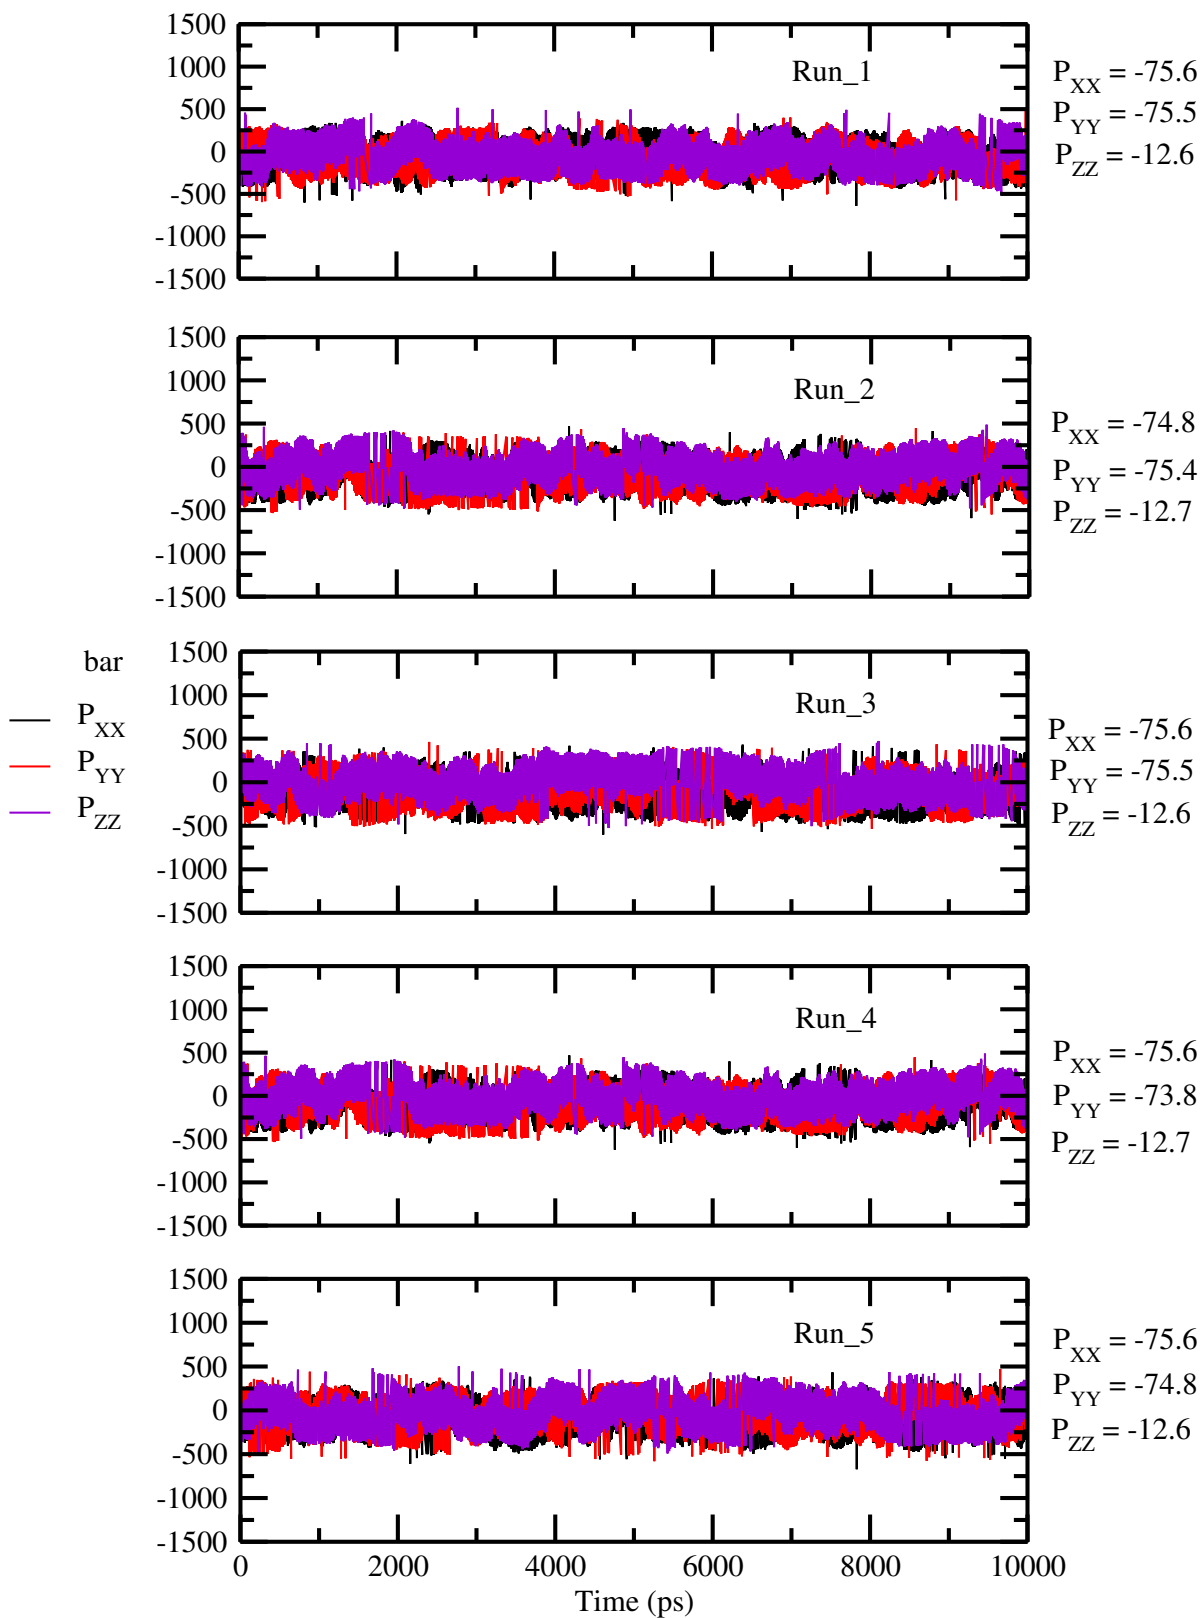

Figure. S 10: The calculated pressure tensor along x, y and z axis for system 1 has been shown.

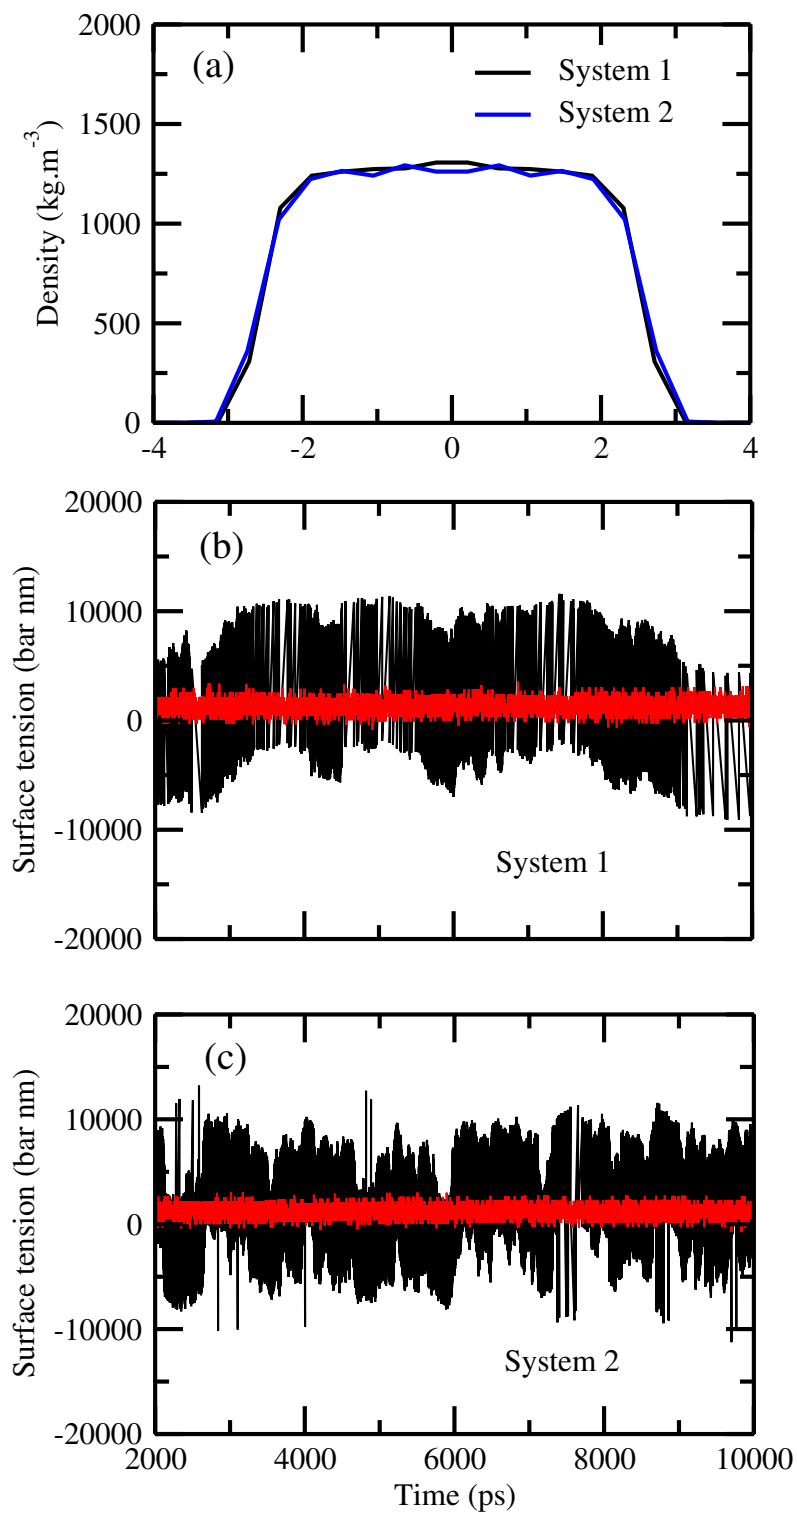

Figure. S 11: The calculated surface tension for system 1 and 2. The red line corresponds to the running average.

| Systems | $f_{n=1}$ | $f_{n=2}$ | $f_{n=3}$ | $f_{n=4}$ | $f_{n=5}$ | $f_{n=6}$ | $f_{n=7}$ | $f_{n=8}$ | $f_{n=9}$ | $f_{n=10}$ | $\langle n_{HB} \rangle$ |
|---------|-----------|-----------|-----------|-----------|-----------|-----------|-----------|-----------|-----------|------------|--------------------------|
| 1       | 0.59      | 19.02     | 31.23     | 36.28     | 10.12     | 2.02      | 0.41      | 0.09      | 0.01      | 0.00       | 3.44                     |
| 2       | 0.73      | 19.52     | 32.80     | 33.77     | 10.18     | 2.14      | 0.44      | 0.09      | 0.02      | 0.00       | 3.41                     |
| 3       | 0.73      | 19.51     | 29.71     | 34.70     | 11.47     | 2.74      | 0.64      | 0.15      | 0.03      | 0.01       | 3.48                     |
| 4       | 0.81      | 19.67     | 30.95     | 33.02     | 11.48     | 2.88      | 0.69      | 0.16      | 0.03      | 0.01       | 3.46                     |
| 5       | 0.00      | 0.80      | 22.18     | 67.61     | 9.25      | 0.16      | 0.00      | 0.00      | 0.00      | 0.00       | 3.86                     |
| 6       | 0.57      | 17.96     | 31.33     | 36.77     | 10.55     | 2.07      | 0.42      | 0.08      | 0.02      | 0.00       | 3.46                     |
| 7       | 0.71      | 18.59     | 32.91     | 34.33     | 10.41     | 2.21      | 0.45      | 0.09      | 0.02      | 0.00       | 3.43                     |
| 8       | 13.94     | 24.17     | 25.52     | 19.84     | 8.53      | 3.21      | 1.10      | 0.35      | 0.10      | 0.02       | 2.92                     |
| 9       | 0.75      | 15.40     | 31.55     | 35.18     | 12.62     | 3.22      | 0.77      | 0.18      | 0.04      | 0.01       | 3.57                     |

Table S 3: The percentage of water molecules having  $n$  number of water-water hydrogen bonds and the average number of hydrogen bonds ( $n_{HB}$ ) per water molecule.

| Systems | $f_{n=1}$ | $f_{n=2}$ | $f_{n=3}$ | $f_{n=4}$ | $f_{n=5}$ | $f_{n=6}$ | $f_{n=7}$ | $f_{n=8}$ | $f_{n=9}$ | $f_{n=10}$ | $\langle n_{HB} \rangle$ |
|---------|-----------|-----------|-----------|-----------|-----------|-----------|-----------|-----------|-----------|------------|--------------------------|
| 1       | 28.63     | 9.23      | 1.85      | 0.36      | 0.05      | 0.0       | 0.0       | 0.0       | 0.0       | 0.0        | 0.54                     |
| 2       | 63.60     | 5.98      | 0.72      | 0.08      | 0.01      | 0.0       | 0.0       | 0.0       | 0.0       | 0.0        | 0.78                     |
| 3       | 53.16     | 5.28      | 0.79      | 0.11      | 0.01      | 0.0       | 0.0       | 0.0       | 0.0       | 0.0        | 0.67                     |
| 4       | 57.50     | 6.36      | 1.01      | 0.14      | 0.02      | 0.0       | 0.0       | 0.0       | 0.0       | 0.0        | 0.74                     |
| 5       | -         | -         | -         | -         | -         | -         | -         | -         | -         | -          | -                        |
| 6       | 28.98     | 9.54      | 1.93      | 0.38      | 0.05      | 0.01      | 0.0       | 0.0       | 0.0       | 0.0        | 0.56                     |
| 7       | 65.24     | 6.24      | 0.76      | 0.09      | 0.01      | 0.0       | 0.0       | 0.0       | 0.0       | 0.0        | 0.80                     |
| 8       | 56.53     | 10.33     | 1.76      | 0.31      | 0.05      | 0.01      | 0.0       | 0.0       | 0.0       | 0.0        | 0.84                     |
| 9       | 62.17     | 12.63     | 2.25      | 0.43      | 0.07      | 0.01      | 0.0       | 0.0       | 0.0       | 0.0        | 0.96                     |

Table S 4: The percentage of water molecules having  $n$  number of water-hydronium ion hydrogen bonds and the average number of hydrogen bonds ( $n_{HB}$ ) per hydronium ion.

| Systems | $f_{n=1}$ | $f_{n=2}$ | $f_{n=3}$ | $f_{n=4}$ | $f_{n=5}$ | $f_{n=6}$ | $f_{n=7}$ | $f_{n=8}$ | $f_{n=9}$ | $f_{n=10}$ | $\langle n_{HB} \rangle$ |
|---------|-----------|-----------|-----------|-----------|-----------|-----------|-----------|-----------|-----------|------------|--------------------------|
| 1       | 4.46      | 16.15     | 29.11     | 26.35     | 14.43     | 5.82      | 2.08      | 0.72      | 0.23      | 0.07       | 3.60                     |
| 2       | 5.67      | 11.15     | 15.76     | 17.71     | 16.28     | 12.69     | 8.57      | 5.12      | 2.73      | 1.33       | 3.54                     |
| 3       | 5.24      | 18.00     | 29.44     | 24.37     | 12.79     | 5.55      | 2.37      | 1.00      | 0.39      | 0.14       | 4.43                     |
| 4       | 4.41      | 15.62     | 27.28     | 25.07     | 14.67     | 6.86      | 3.14      | 1.45      | 0.62      | 0.24       | 3.74                     |
| 5       | -         | -         | -         | -         | -         | -         | -         | -         | -         | -          | -                        |
| 6       | 5.35      | 18.40     | 30.48     | 25.05     | 12.59     | 4.87      | 1.72      | 0.59      | 0.18      | 0.05       | 3.45                     |
| 7       | 6.13      | 19.60     | 30.27     | 23.87     | 11.86     | 4.68      | 1.80      | 0.66      | 0.22      | 0.07       | 3.40                     |
| 8       | 4.99      | 17.89     | 29.76     | 24.36     | 12.78     | 5.57      | 2.41      | 1.03      | 0.40      | 0.14       | 3.55                     |
| 9       | 5.44      | 18.39     | 29.20     | 23.69     | 12.50     | 5.65      | 2.58      | 1.16      | 0.47      | 0.18       | 3.54                     |

Table S 5: The percentage of water molecules having n number of water-bisulfate ion hydrogen bonds and the average number of hydrogen bonds ( $n_{HB}$ ) per bisulfate ion.

| Systems | $f_{n=1}$ | $f_{n=2}$ | $f_{n=3}$ | $f_{n=4}$ | $f_{n=5}$ | $f_{n=6}$ | $f_{n=7}$ | $f_{n=8}$ | $f_{n=9}$ | $f_{n=10}$ | $\langle n_{HB} \rangle$ |
|---------|-----------|-----------|-----------|-----------|-----------|-----------|-----------|-----------|-----------|------------|--------------------------|
| 1       | 2.34      | 7.72      | 15.87     | 22.11     | 21.56     | 15.20     | 8.20      | 3.81      | 1.68      | 0.72       | 4.63                     |
| 2       | 3.05      | 10.08     | 19.30     | 23.84     | 20.00     | 12.26     | 6.06      | 2.80      | 1.29      | 0.57       | 4.32                     |
| 3       | 1.94      | 7.02      | 15.37     | 22.22     | 21.92     | 15.36     | 8.21      | 3.95      | 1.98      | 1.00       | 4.70                     |
| 4       | 1.60      | 6.24      | 14.25     | 21.28     | 21.69     | 15.86     | 9.04      | 4.78      | 2.58      | 1.36       | 4.84                     |
| 5       | -         | -         | -         | -         | -         | -         | -         | -         | -         | -          | -                        |
| 6       | 4.14      | 11.33     | 19.24     | 22.28     | 18.80     | 12.08     | 6.35      | 2.96      | 1.27      | 0.52       | 4.25                     |
| 7       | 3.15      | 10.55     | 20.12     | 24.60     | 19.74     | 11.59     | 5.48      | 2.44      | 1.13      | 0.47       | 4.24                     |
| 8       | 2.97      | 9.62      | 18.50     | 23.11     | 19.85     | 12.41     | 6.51      | 3.35      | 1.73      | 0.88       | 4.41                     |
| 9       | 2.58      | 9.15      | 18.58     | 23.50     | 20.18     | 12.36     | 6.37      | 3.35      | 1.84      | 0.98       | 4.43                     |

Table S 6: The percentage of water molecules having n number of water-sulfate ion hydrogen bonds and the average number of hydrogen bonds ( $n_{HB}$ ) per sulfate ion.

## References

- [1] M. Parrinello and A. Rahman, *J. Chem. Theory Comput.*, 1981, **52**, 7182–7190.
- [2] S. Nosé, *Molecular Physics*, 1984, **52**, 255–268.
- [3] G. Hoover, *Phys. Rev. A*, 1985, **31**, 1695.
- [4] B. Hess, *J. Chem. Theory Comput.*, 2008, **4**, 116–122.
- [5] T. Darden, D. York and L. Pedersen, *J. Chem. Phys*, 1993, **98**, 10089–10092.
- [6] U. Essmann, L. Perera, M. L. Berkowitz, T. Darden, H. Lee and L. G. Pedersen, *J. Chem. Phys*, 1995, **103**, 8577–8593.
- [7] H. A. Lorentz, *Annalen der Physik*, 1881, **248**, 127–136.
- [8] D. Berthelot, *Sur le mélange des gaz*, *Comptes rendus hebdomadaires des séances de l'Académie des Sciences*, 1898.
- [9] J.-P. Ryckaert and A. Bellemans, *Chem. Phys. Lett.*, 1975, **30**, 123–125.
